# Supplementary material
Source: PubMed Central journal article supplement (PMC3713216)
Supplement: supp_en.2012-2162_EN-12-2162_Fig1_Tabs3.pdf [file supp_en.2012-2162_EN-12-2162_Fig1_Tabs3.pdf]

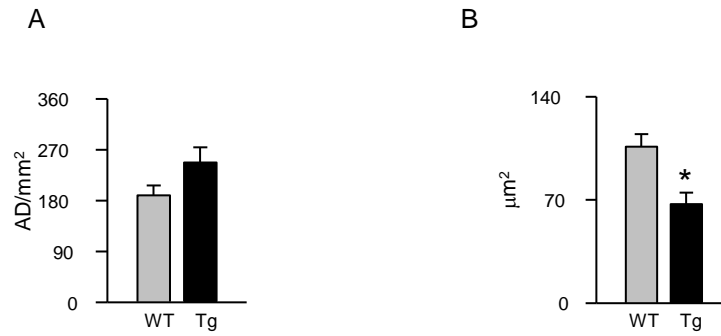

**Supplemental Figure 1. Adipocytes in proximal tibia.** A. Number of adipocytes. B. Average area of single adipocyte. \*  $p < 0.05$

**Supplemental Table 1.** Primers used for determination of gene expression in real-time q-PCR.

| Gene          | Forward (5'→3')           | Reverse (5'→3')              |
|---------------|---------------------------|------------------------------|
| 18S           | TTCGAACGTCTGCCCTATCAA     | ATGGTAGGCACGGCGACTA          |
| FoxC2         | CACCGGCTGGGGATTGAG        | ATAGAGAGGCGGCGTGGAT          |
| Prdm16        | CCTAACTTTCCCCACTCCCTTA    | GCTCAGCCTTGACCAGCAA          |
| B3AR          | GGCACAGGAATGCCACTCCAAT    | AGGAGGGGAAGGTAGAAGGAGAC      |
| UCP1          | GCAACTTGGAGGAAGAGATACTGAA | TGTAAATAAAGTCAACGGAGCTGTTC   |
| Dio2          | AAATGACCCCTTTGGTTTCC      | TTCCCCATTATCCTTTCC           |
| IRS1          | CCAGCCTGGCTATTTAGCTG      | CCCAACTCAACTCCACCACT         |
| Socs3         | CCTTTGACAAGCGGACTCTC      | GGTTATTTCTTTGGCCAGCA         |
| CyclinD1      | CCAGAGGCGGATGAGAACAA      | GGCACAGAGGGCCACAAA           |
| Dlx5          | TGACAGGAGTGTTTGACAGAAGAGT | CGGGAACGGAGCTTGGA            |
| Osteocalcin   | CGGCCCTGAGTCTGACAAA       | GCCGGAGTCTGTTCACTACCTT       |
| SOST          | CCTCCTCCTGAGAACAACCA      | ACATCTTTGGCGTCATAGGG         |
| Dmp1          | TGTCATTCTCCTTGTGTTCTTTG   | AGAGCTTTCAGATTCAGTATTGTGGTAT |
| RANKL         | CCTGAGGCCAGCCATTT         | CTTGGCCCAGCCTCGAT            |
| IGFBP2        | CTGTGACAAGCATGGCCGGT      | AGCTCCCTGGATGGGCTTCCC        |
| Wnt10b        | AATGAAGGTGAGCCTCGCC       | TGAAAGAGAGCAGCCCTCACA        |
| IGF1          | AATTTGGCCTCCTTAAGAGCAA    | ATGCCACAGATGGAGTCAGGT        |
| Adiponectin   | GGCCGTTCTCTTACCTACG       | TGGAGGAGCACAGAGCCAG          |
| BMP4          | TCAAGGGAGTGGAGATTGGG      | GCCATCATGGCCAAAAGTG          |
| Angiopoietin2 | GCATGACCTAATGGAGACCGT     | GATAGCAACCGAGCTCTTGGAG       |

**Supplemental Table 2.** mCT analysis of bone derived from 2 and 5 mo old FoxC2<sub>AD</sub><sup>+Tg</sup> and WT mice.

|                       | Females          |                                    |                  |                                    | Males            |                                    |                              |                                    |
|-----------------------|------------------|------------------------------------|------------------|------------------------------------|------------------|------------------------------------|------------------------------|------------------------------------|
|                       | 2 mo             |                                    | 5 mo             |                                    | 2 mo             |                                    | 5 mo                         |                                    |
|                       | WT               | FoxC2 <sub>AD</sub> <sup>+Tg</sup> | WT               | FoxC2 <sub>AD</sub> <sup>+Tg</sup> | WT               | FoxC2 <sub>AD</sub> <sup>+Tg</sup> | WT                           | FoxC2 <sub>AD</sub> <sup>+Tg</sup> |
|                       | N = 7            | N = 8                              | N = 8            | N = 8                              | N = 5            | N = 5                              | N = 8                        | N = 10                             |
| <i>Proximal Tibia</i> |                  |                                    |                  |                                    |                  |                                    |                              |                                    |
| TV (mm <sup>3</sup> ) | 2.341<br>(0.449) | 2.928 <sup>A</sup><br>(0.339)      | 2.353<br>(0.312) | 2.804<br>(0.280)                   | 3.176<br>(0.193) | 3.784<br>(0.185)                   | 2.943<br>(0.384)             | 3.540<br>(0.400)                   |
| BV (mm <sup>3</sup> ) | 0.068<br>(0.022) | 0.141 <sup>A</sup><br>(0.035)      | 0.064<br>(0.018) | 0.128 <sup>A,B</sup><br>(0.034)    | 0.096<br>(0.034) | 0.161 <sup>A</sup><br>(0.015)      | 0.157<br>(0.017)             | 0.309 <sup>A,B,C</sup><br>(0.090)  |
| BV/TV (%)             | 2.84<br>(0.537)  | 4.83 <sup>A</sup><br>(1.029)       | 2.71<br>(0.615)  | 4.62 <sup>A,B</sup><br>(1.453)     | 2.98<br>(0.953)  | 4.24 <sup>A</sup><br>(0.354)       | 5.58 <sup>B</sup><br>(1.187) | 8.63 <sup>A,B,C</sup><br>(1.528)   |
| Conn.D                | 125.8            | 412.8 <sup>A</sup>                 | 89.9             | 159.9 <sup>C</sup>                 | 93.3             | 353.6 <sup>A</sup>                 | 356.2 <sup>B</sup>           | 621.1 <sup>B</sup>                 |

|                                          |         |                    |                    |                        |         |         |                    |                      |
|------------------------------------------|---------|--------------------|--------------------|------------------------|---------|---------|--------------------|----------------------|
| (1/mm <sup>3</sup> )                     | (69.4)  | (176.0)            | (38.1)             | (65.1)                 | (78.6)  | (63.0)  | (89.0)             | (218.6)              |
| SMI                                      | 3.443   | 3.132              | 3.124              | 2.387 <sup>A,B,C</sup> | 3.640   | 3.578   | 2.364 <sup>B</sup> | 2.068 <sup>B,C</sup> |
|                                          | (0.250) | (0.268)            | (0.283)            | (0.222)                | (0.205) | (0.091) | (0.215)            | (0.100)              |
| Tb.N (1/mm)                              | 2.854   | 3.338 <sup>A</sup> | 2.272 <sup>B</sup> | 1.914 <sup>A,B,C</sup> | 4.047   | 4.396   | 3.825              | 4.385 <sup>A</sup>   |
|                                          | (0.294) | (0.368)            | (0.448)            | (0.362)                | (0.200) | (0.334) | (0.394)            | (0.170)              |
| Tb.Th (mm)                               | 0.023   | 0.024              | 0.032 <sup>B</sup> | 0.038 <sup>A,B,C</sup> | 0.021   | 0.021   | 0.029 <sup>B</sup> | 0.03 <sup>B,C</sup>  |
|                                          | (0.003) | (0.003)            | (0.002)            | (0.004)                | (0.002) | (0.001) | (0.002)            | (0.000)              |
| Tb.Sp (mm)                               | 0.358   | 0.309 <sup>A</sup> | 0.473 <sup>B</sup> | 0.555 <sup>A,B,C</sup> | 0.256   | 0.232   | 0.267              | 0.233 <sup>A</sup>   |
|                                          | (0.036) | (0.036)            | (0.123)            | (0.090)                | (0.018) | (0.019) | (0.029)            | (0.010)              |
| <i>Cortical bone in tibia metaphysis</i> |         |                    |                    |                        |         |         |                    |                      |
| CtAr (mm <sup>2</sup> )                  | 0.186   | 0.198              | 0.195              | 0.207                  | 0.196   | 0.187   | 0.258 <sup>B</sup> | 0.262 <sup>B,C</sup> |
|                                          | (0.017) | (0.026)            | (0.081)            | (0.085)                | (0.021) | (0.014) | (0.022)            | (0.030)              |
| CtTh (mm)                                | 0.166   | 0.165              | 0.189              | 0.183                  | 0.162   | 0.155   | 0.197 <sup>B</sup> | 0.192 <sup>B,C</sup> |

|                                            |         |                    |                    |                      |         |                    |                    |                      |
|--------------------------------------------|---------|--------------------|--------------------|----------------------|---------|--------------------|--------------------|----------------------|
|                                            | (0.011) | (0.019)            | (0.019)            | (0.017)              | (0.008) | (0.003)            | (0.011)            | (0.014)              |
| MdAr (mm <sup>2</sup> )                    | 0.156   | 0.174              | 0.138              | 0.214 <sup>A</sup>   | 0.180   | 0.188              | 0.195              | 0.213                |
|                                            | (0.014) | (0.013)            | (0.053)            | (0.050)              | (0.023) | (0.016)            | (0.005)            | (0.030)              |
| <i>Vertebral body (L4 lumbar vertebra)</i> |         |                    |                    |                      |         |                    |                    |                      |
| TV (mm <sup>3</sup> )                      | 1.442   | 1.840              | 2.436 <sup>B</sup> | 2.986 <sup>B,C</sup> | 1.937   | 2.138              | 2.558 <sup>B</sup> | 2.847 <sup>B,C</sup> |
|                                            | (0.567) | (0.493)            | (0.480)            | (0.579)              | (0.030) | (0.153)            | (0.136)            | (0.283)              |
| BV (mm <sup>3</sup> )                      | 0.024   | 0.060 <sup>A</sup> | 0.153 <sup>B</sup> | 0.234 <sup>B,C</sup> | 0.042   | 0.066 <sup>A</sup> | 0.164 <sup>B</sup> | 0.216 <sup>B,C</sup> |
|                                            | (0.010) | (0.015)            | (0.056)            | (0.073)              | (0.009) | (0.007)            | (0.027)            | (0.013)              |
| BV/TV (%)                                  | 1.70    | 3.45 <sup>A</sup>  | 6.16 <sup>B</sup>  | 7.75 <sup>B,C</sup>  | 2.18    | 3.09 <sup>A</sup>  | 6.47 <sup>B</sup>  | 7.65 <sup>B,C</sup>  |
|                                            | (0.21)  | (1.14)             | (1.41)             | (1.52)               | (0.961) | (0.952)            | (1.42)             | (1.99)               |
| Tb.N (1/mm)                                | 2.840   | 4.019 <sup>A</sup> | 2.850              | 3.394 <sup>A,B</sup> | 3.963   | 4.920 <sup>A</sup> | 4.443 <sup>B</sup> | 5.102 <sup>A,B</sup> |
|                                            | (0.365) | (0.462)            | (0.407)            | (0.287)              | (0.303) | (0.272)            | (0.265)            | (0.141)              |
| Tb.Th (mm)                                 | 0.025   | 0.027              | 0.036 <sup>B</sup> | 0.035 <sup>B,C</sup> | 0.023   | 0.023              | 0.030 <sup>B</sup> | 0.029 <sup>B,C</sup> |

|            |         |                    |         |                        |         |                    |         |                      |
|------------|---------|--------------------|---------|------------------------|---------|--------------------|---------|----------------------|
|            | (0.005) | (0.003)            | (0.003) | (0.002)                | (0.001) | (0.001)            | (0.002) | (0.001)              |
| Tb.Sp (mm) | 0.358   | 0.252 <sup>A</sup> | 0.361   | 0.301 <sup>A,B,C</sup> | 0.253   | 0.203 <sup>A</sup> | 0.227   | 0.196 <sup>A,B</sup> |
|            | (0.046) | (0.026)            | (0.048) | (0.026)                | (0.018) | (0.011)            | (0.014) | (0.006)              |

Values in parentheses correspond to  $\pm$  SD. <sup>A</sup> p < 0.05 vs. age-matched WT control; <sup>B</sup> p < 0.05 vs. 2 mo old WT; <sup>C</sup> p < 0.05 2 mo vs 5 mo old FoxC2<sub>AD</sub><sup>+Tg</sup>

**Supplemental Table 3.** MicroCT-based determination of moment of inertia

|                                 | Females          |                                    |                  |                                    | Males            |                                    |                  |                                    |
|---------------------------------|------------------|------------------------------------|------------------|------------------------------------|------------------|------------------------------------|------------------|------------------------------------|
|                                 | 2 mo             |                                    | 5 mo             |                                    | 2 mo             |                                    | 5 mo             |                                    |
|                                 | WT               | FoxC2 <sub>AD</sub> <sup>+Tg</sup> |
|                                 | N = 5            | N = 5                              | N = 5            | N = 5                              | N = 5            | N = 5                              | N = 5            | N = 5                              |
| pMOI<br>(mm <sup>4</sup> )      | 0.091<br>(0.020) | 0.101<br>(0.018)                   | 0.188<br>(0.021) | 0.238 <sup>A</sup><br>(0.026)      | 0.117<br>(0.026) | 0.112<br>(0.019)                   | 0.185<br>(0.023) | 0.201<br>(0.048)                   |
| Imin/Cmin<br>(mm <sup>3</sup> ) | 0.077<br>(0.009) | 0.084<br>(0.009)                   | 0.130<br>(0.011) | 0.140<br>(0.015)                   | 0.091<br>(0.014) | 0.088<br>(0.008)                   | 0.119<br>(0.009) | 0.128<br>(0.021)                   |
| Imax/Cmax<br>(mm <sup>3</sup> ) | 0.087<br>(0.019) | 0.094<br>(0.015)                   | 0.151<br>(0.013) | 0.181 <sup>A</sup><br>(0.010)      | 0.104<br>(0.021) | 0.104<br>(0.016)                   | 0.154<br>(0.014) | 0.160<br>(0.030)                   |

pMOI (polar moment of inertia) indicates torsional strength along the bone; Imin/Cmin indicates bending strength across the bone along the minimal centroid-edge distance; Imax/Cmax indicates bending strength across the bone along the maximal centroid-edge distance. Values in parentheses correspond to  $\pm$  SD. <sup>A</sup> p < 0.05 vs. age-matched WT control.
